# Supplementary material for: Integrating Theory and Practice to Increase Scientific Workforce Diversity: A Framework for Career Development in Graduate Research Training
Source: Atypon-hosted journal article supplement (doi:10.1187/cbe.10-12-0145), 2011-12-01
Supplement: combinedsupmats.pdf [file combinedsupmats.pdf]

## **Supplemental Material**

The Innovations in Medical Education (IME) Video Library is a collection of free, high quality videos of educational events that have taken place at the University of Wisconsin (UW) Health Sciences Learning Center (HSLC). IME is supported by a grant from the Wisconsin Partnership Fund for a Healthy Future (Blue Cross Program).

Weblink to Video of Career Coach Training Session: <http://videos.med.wisc.edu/presenters/846>

Presenter: Dr. Angela Byars-Winston

Date: July 2008
